# Supplementary material for: Improving the performance of pure-red 2D tin-based perovskite light-emitting diodes through N -methylthiourea ligand engineering
Source: Royal Society of Chemistry journal article supplement (doi:10.1039/d4tc02025a), 2024-01-01
Supplement: d4tc02025a1.pdf [file d4tc02025a1.pdf]

# Improving the performance of pure-red 2D tin-based perovskite light-emitting diodes through N-methylthiourea ligand engineering-

## Supporting Information

Shulan Zhang <sup>a,c</sup>; Mujing Qu <sup>a</sup>; Jiaxin Duan<sup>a</sup>; Henglong Dai<sup>a</sup>; Tongtong Xuan<sup>b\*</sup>; Rongjun Xie<sup>b\*</sup>; and Huili Li<sup>a, c\*</sup>

### AFFILIATIONS

<sup>a</sup>Engineering Research Center for Nanophotonics & Advanced Instrument, Ministry of Education, School of Physics and Electronic Science, East China Normal University, Shanghai 200241, P. R. China

<sup>b</sup>Fujian Key Laboratory of Surface and Interface Engineering for High Performance Materials, College of Materials, Xiamen University, Xiamen 361005, China

<sup>c</sup>Chongqing Key Laboratory of Precision Optics, Chongqing Institute of East China Normal University, Chongqing 401120, China

\*Correspondence: [txuan@xmu.edu.cn](mailto:txuan@xmu.edu.cn) (T.X.), [rjxie@xmu.edu.cn](mailto:rjxie@xmu.edu.cn) (R. X.), [hlli@phy.ecnu.edu.cn](mailto:hlli@phy.ecnu.edu.cn) (H.L.);

### The section of calculation:

1. The bleach recovery kinetics were fitted by a double exponential decay equation:<sup>1</sup>

$$A(t) = A_1 e^{-\frac{t}{\tau_1}} + A_2 e^{-\frac{t}{\tau_2}} \quad (1)$$

Where  $A_1$  and  $A_2$  are the amplitudes of each component and  $\tau_1$  and  $\tau_2$  are the corresponding lifetimes.

Then, the average lifetimes were calculated by the following equation:

$$\tau_{avg} = \frac{A_1 \tau_1^2 + A_2 \tau_2^2}{A_1 \tau_1 + A_2 \tau_2} \quad (2)$$

The radiative ( $k_{rad}$ ) and nonradiative recombination rates ( $k_{nonrad}$ ) of the control and N-MTU-modified perovskite films were calculated by the following equations:<sup>2</sup>

$$\frac{1}{\tau_{avg}} = k_{rad} + k_{nonrad} \quad (3)$$

$$PLQY = \frac{k_{rad}}{k_{rad} + k_{nonrad}} \quad (4)$$

$$k_{rad} = \frac{PLQY}{\tau_{avg}} \quad (5)$$

$$k_{nonrad} = \frac{1}{\tau_{avg}} - k_{rad} \quad (6)$$

2. The characterization of space charge limited current (SCLC):

The charge carrier mobility was fitted by the current density-voltage ( $J$ - $V$ ) curves of only-electron/hole devices using SCLC measurements.

**The Mott-Gurney law:**<sup>3,4</sup>

$$J = \frac{9}{8} \mu \epsilon_0 \epsilon_r \frac{V^2}{L^3} \quad (7)$$

Where  $J$  is the current density,  $\mu$  is the charge carrier mobility,  $\epsilon_0$  is vacuum dielectric constant,  $\epsilon_r$  is the relative dielectric constant ( $\epsilon_r = 3$ ),  $V$  is the applied voltage and  $L$  is the thickness between the cathode and anode of the perovskite film.

Poole-Frenkel law:<sup>5</sup>

$$\mu = \mu_0 e^{\gamma\sqrt{E}} \quad (8)$$

Where  $\mu_0$  is the zero electric field mobility,  $\gamma$  is the electric field dependence factor, and  $E$  is the electric field ( $E = V/L$ ).

Combined the Mott-Gurney law and Poole-Frenkel law, we can deduce the relational expression as following:

$$\ln\left(\frac{J}{E^2}\right) = \ln\left(\frac{9\varepsilon_r\varepsilon_0\mu_0}{8L}\right) + \gamma\sqrt{E} \quad (9)$$

There is a linear relationship between  $\ln\left(\frac{J}{E^2}\right)$  and  $\sqrt{E}$ . The  $\gamma$  and  $\mu_0$  can be obtained by fitting the slope and intercept. Then, the field-dependent charge-carrier mobility under fixed electric field was got by substituting  $\gamma$  and  $\mu_0$  into Poole-Frenkel law.

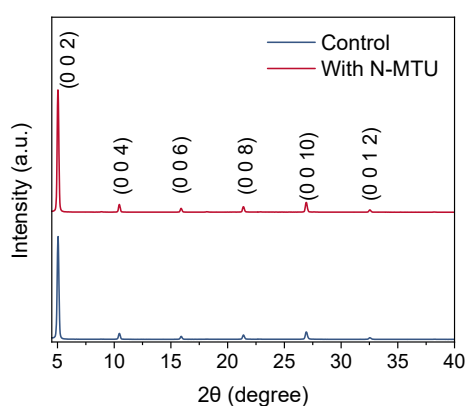

Figure S1. XRD patterns of the control and N-MTU-modified  $\text{PEA}_2\text{SnI}_4$  film.

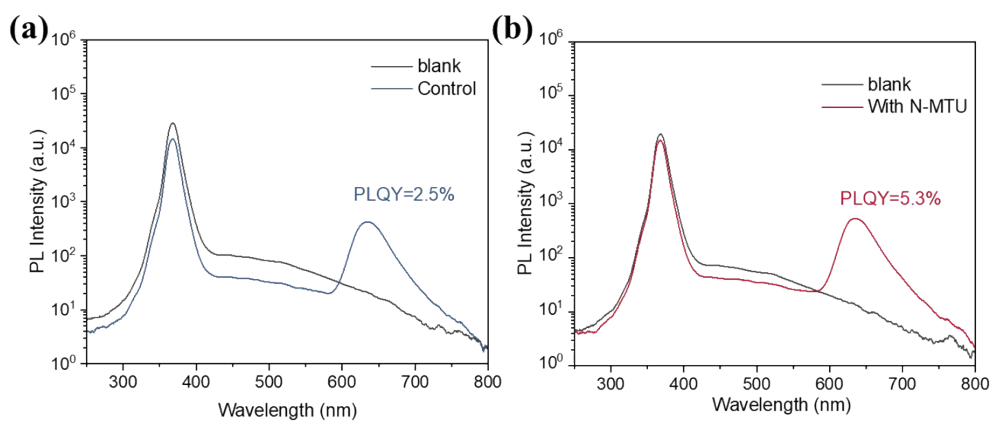

Figure S2. PL Spectra for the calculation of PLQYs of  $\text{PEA}_2\text{SnI}_4$  films without (a) and with N-MTU additive (b).

All sample bases used to calculate PLQY were ITO/PEDOT:PSS, and the subtraction of the bases was completed before the test.

Table S1. The calculated PL lifetimes data of perovskite films without and with N-MTU additive.

| Calculated data | Control | With N-MTU |
|-----------------|---------|------------|
| $A_1$           | 4535.68 | 4360.08    |
| $A_2$           | 165.92  | 775.09     |

|                               |       |       |
|-------------------------------|-------|-------|
| $\tau_1$ (ns)                 | 0.49  | 0.84  |
| $\tau_2$ (ns)                 | 3.02  | 2.97  |
| $\tau_{avg}$ (ns)             | 1.95  | 2.30  |
| $k_{rad}$ ( $\mu s^{-1}$ )    | 12.82 | 23.04 |
| $k_{nonrad}$ ( $\mu s^{-1}$ ) | 50.00 | 41.17 |

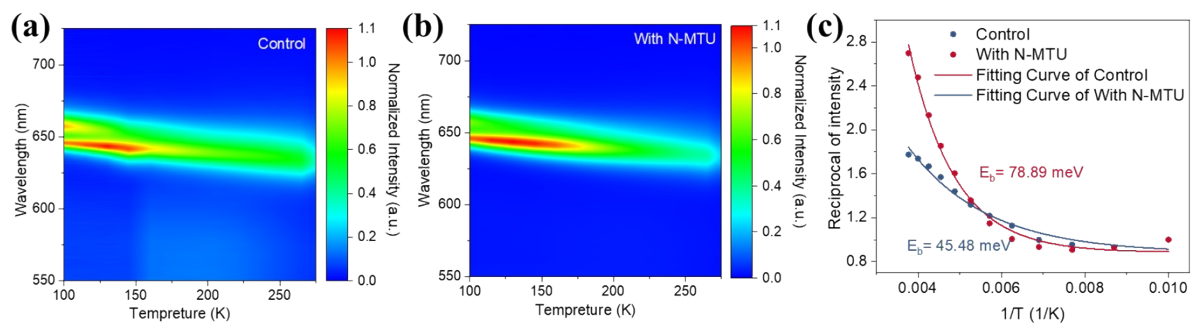

**Figure S3.** Pseudocolor maps of low-temperature-dependent PL spectra (a, b) and exciton binding energy fitting curves (c) of the control and N-MTU modified  $PEA_2SnI_4$  films.

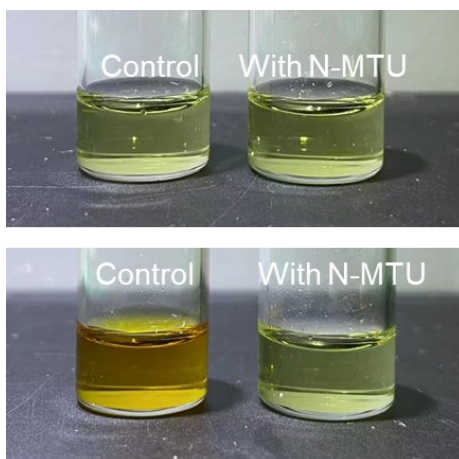

**Figure S4.** Photographs of the fresh  $PEA_2SnI_4$  precursor solution (top) and aged  $PEA_2SnI_4$  precursor solution in the air for 24h (bottom) without and with N-MTU ligands.

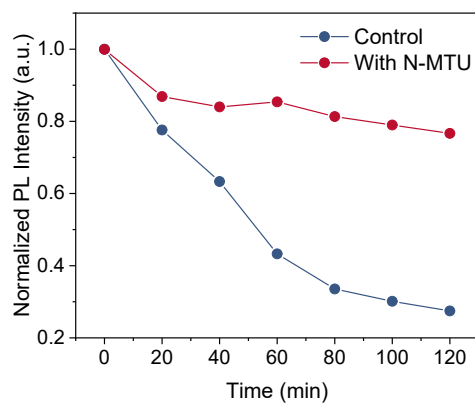

Figure S5. PL stability of PEA<sub>2</sub>SnI<sub>4</sub> thin films with and without N-MTU ligands in air under room temperature.

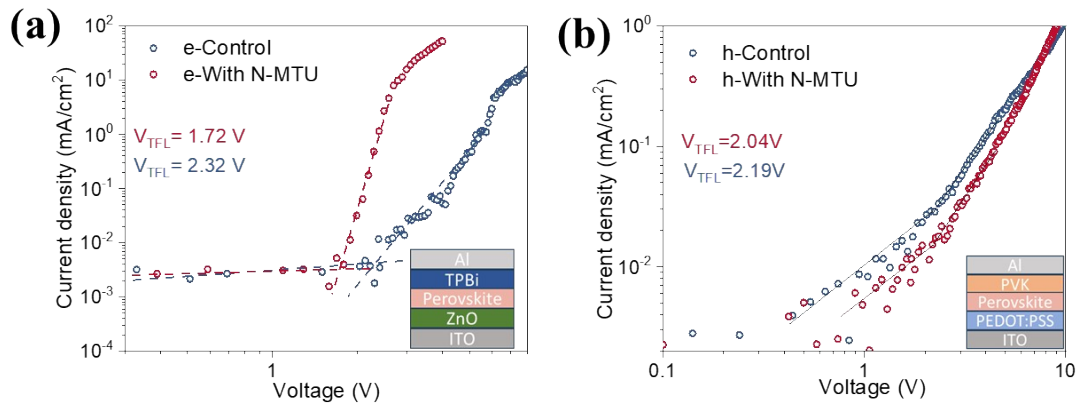

Figure S6. SCLC characteristics of the electron-only (a) and hole-only (b) devices consisting of pristine and N-MTU-modified PEA<sub>2</sub>SnI<sub>4</sub> emission layer.

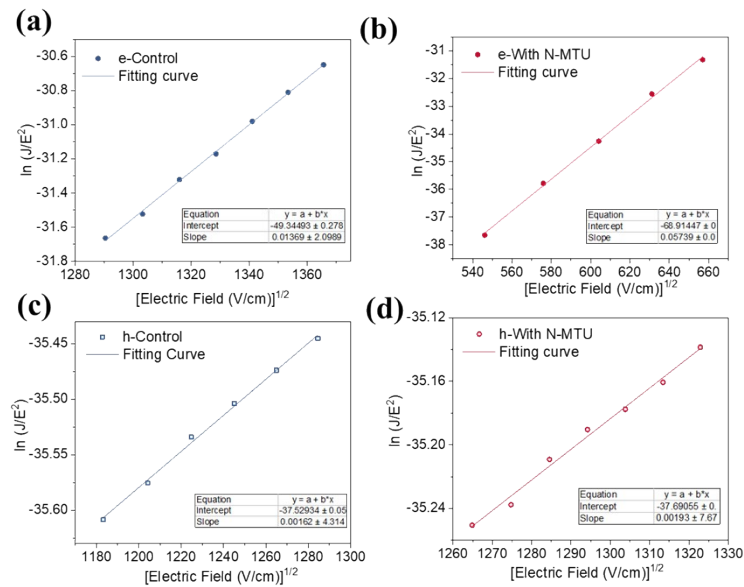

Figure S7.  $\ln\left(\frac{J}{E^2}\right)_{-\sqrt{E}}$  curves of electron-only devices (a, b) and hole-only devices (c, d).

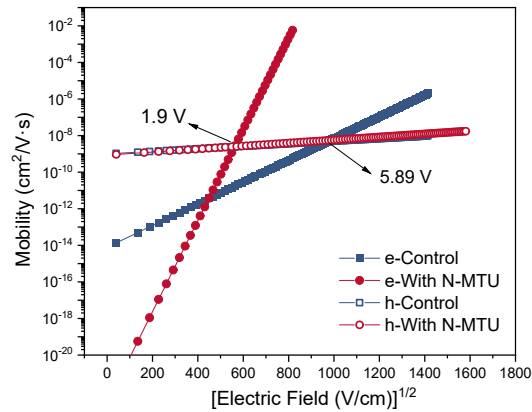

Figure S8. Electric field-dependent charge-carrier mobility of the electron-only and hole-only devices.

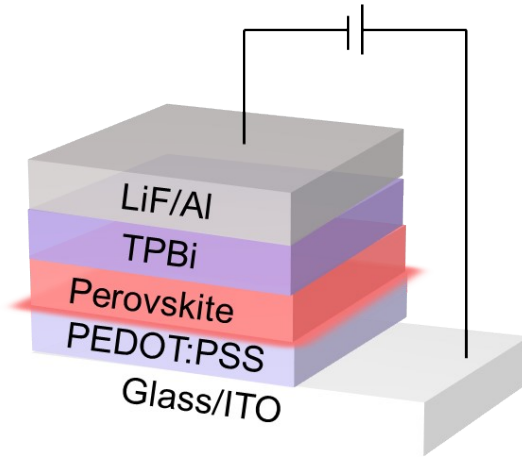

Figure S9. Device structure of the PeLEDs.

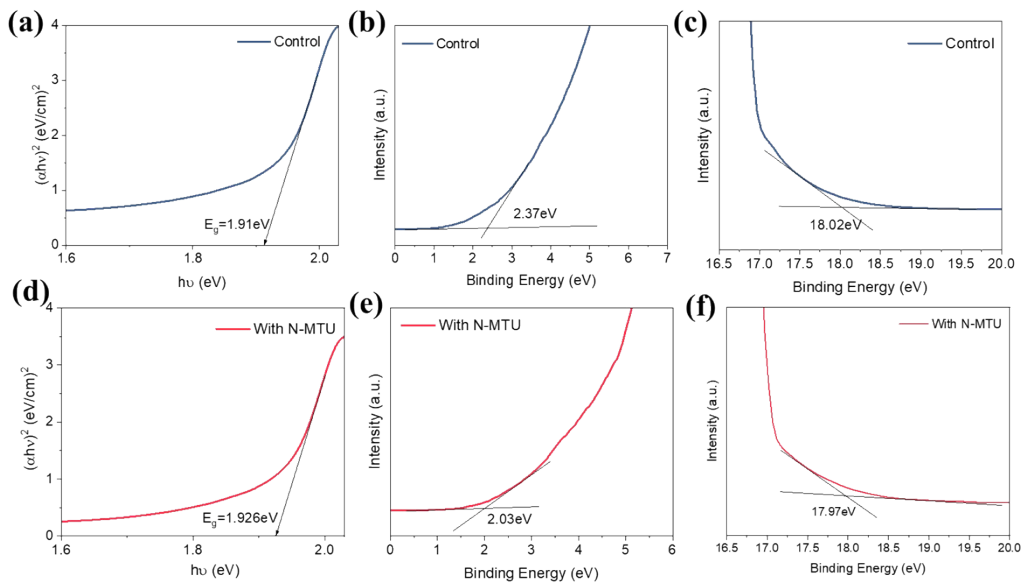

Figure S10. Tauc-plots from the UV-vis absorbance characterizations of control (a) and N-MTU modified  $\text{PEA}_2\text{SnI}_4$  films (d). The UPS spectra of control (b, c) and N-MTU-modified  $\text{PEA}_2\text{SnI}_4$  films (e, f).

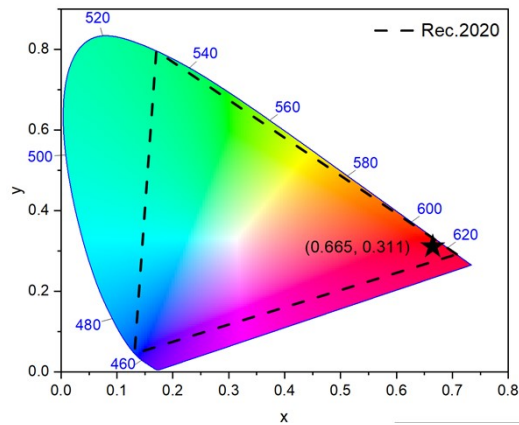

Figure S11. CIE chromaticity coordinates of the N-MTU-based  $\text{PEA}_2\text{SnI}_4$  PeLED and ITU-R Recommendation BT.2020 (Rec.2020) standards.

Table S2. Summary of the device performances of the reported pure-red  $\text{PEA}_2\text{SnI}_4$ -based PeLEDs.

| References                                        | EQE <sub>MAX</sub> (%) | L <sub>MAX</sub> (cd/m <sup>2</sup> ) | EL Peak (nm) | FWHM (nm) |
|---------------------------------------------------|------------------------|---------------------------------------|--------------|-----------|
| ACS Photonics 2020, 7, 1915-1922                  | 0.72                   | 132                                   | 632          | /         |
| Adv. Sci. 2020, 7, 1903213                        | 0.3                    | 70                                    | 633          | 24        |
| J. Phys. D: Appl. Phys. 2020, 53, 414005          | 0.52                   | 355                                   | 630          | 29        |
| Sci. Adv. 2020, 6, eabb0253                       | 5                      | 170                                   | 632          | 21        |
| Adv. Funct. Mater. 2021, 31, 2106974.             | 0.361                  | 68.84                                 | /            | /         |
| J. Mater. Chem. C 2021, 9, 12079-12085            | 1.48                   | 221                                   | 633          | /         |
| ACS Appl. Mater. Interfaces 2022, 14, 22941-22949 | 0.4                    | 43.3                                  | 625          | 28        |
| ACS Energy Lett. 2022, 7, 3653-3655               | 1                      | 30                                    | 630          | 25        |
| Adv. Funct. Mater. 2023, 2301304                  | 3.51                   | 451                                   | 630          | 23        |
| J. Mater. Chem. C 2023, 11, 9916-9924             | 0.86                   | 50                                    | 630          | 23        |
| Angew.Chem. Int.Ed. 2023, e202312728              | 9.32                   | 328.2                                 | 625          | 33        |
| <b>This Work</b>                                  | <b>2.35</b>            | <b>509.4</b>                          | <b>626</b>   | <b>33</b> |

#### REFERENCES:

- 1 F. Yuan, X. Zheng, A. Johnston, Y.-K. Wang, C. Zhou, Y. Dong, B. Chen, H. Chen, J. Z. Fan, G. Sharma, P. Li, Y. Gao, O. Voznyy, H.-T. Kung, Z.-H. Lu, O. M. Bakr and E. H. Sargent, *Sci. Adv.*, 2020, **6**, eabb0253.
- 2 Z. Ren, J. Yu, Z. Qin, J. Wang, J. Sun, C. C. S. Chan, S. Ding, K. Wang, R. Chen, K. S. Wong, X. Lu, W. Yin and W. C. H. Choy, *Adv. Mater.*, 2021, **33**, 2005570.
- 3 L. Pauling, .
- 4 T. Chiba, Y. Hayashi, H. Ebe, K. Hoshi, J. Sato, S. Sato, Y.-J. Pu, S. Ohisa and J. Kido, *Nat. Photonics*, 2018, **12**, 681–687.
- 5 R. I. Frank and J. G. Simmons, *J. Appl. Phys.*, 1967, **38**, 832–840.
